# Supplementary material for: The BioNTech / Pfizer vaccine BNT162b2 induces class-switched SARS-CoV-2-specific plasma cells and potential memory B cells as well as IgG and IgA serum and IgG saliva antibodies upon the first immunization
Source: bioRxiv or medRxiv preprint supplement (doi:10.1101/2021.03.10.21252001), 2021-03-12

**A**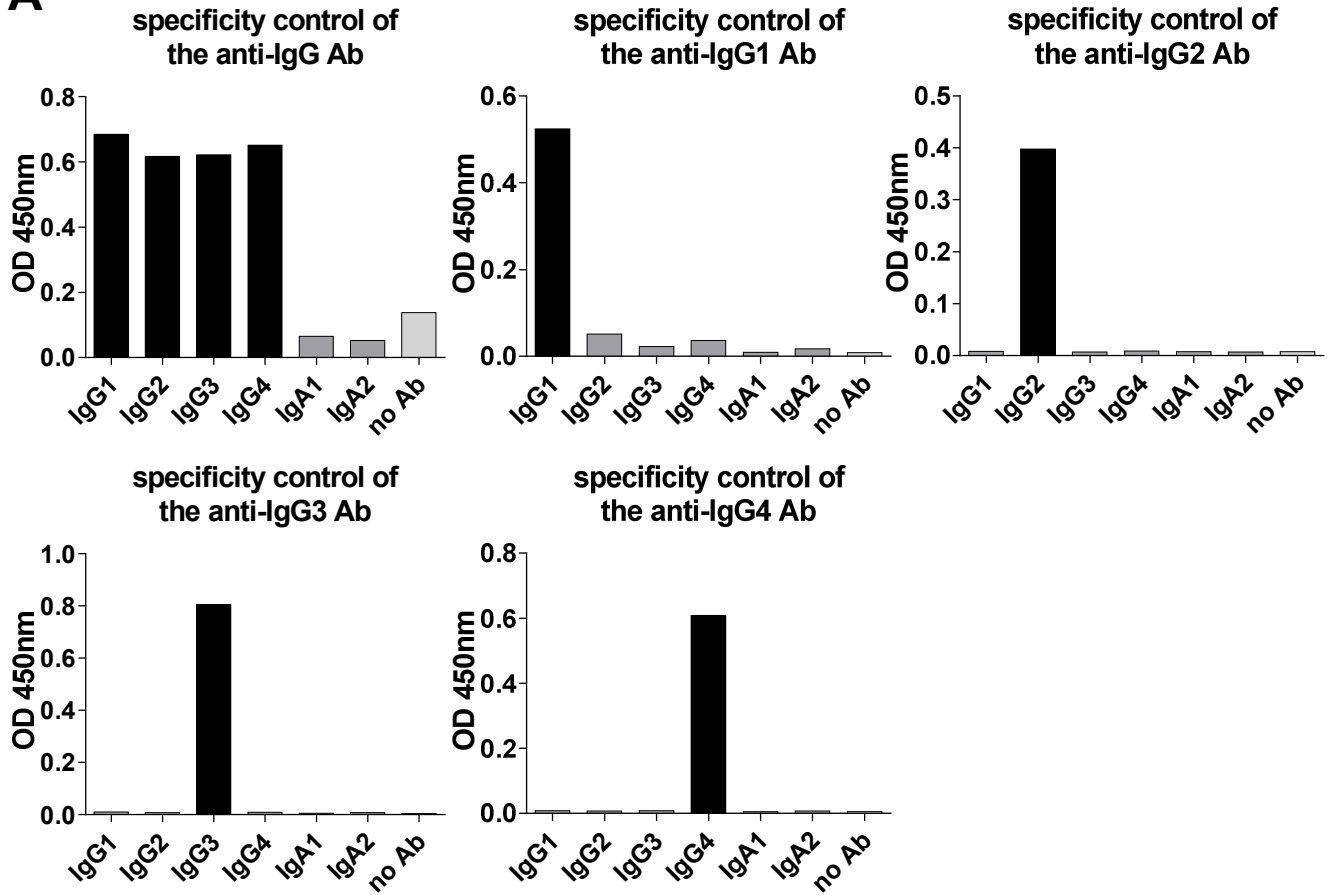**B**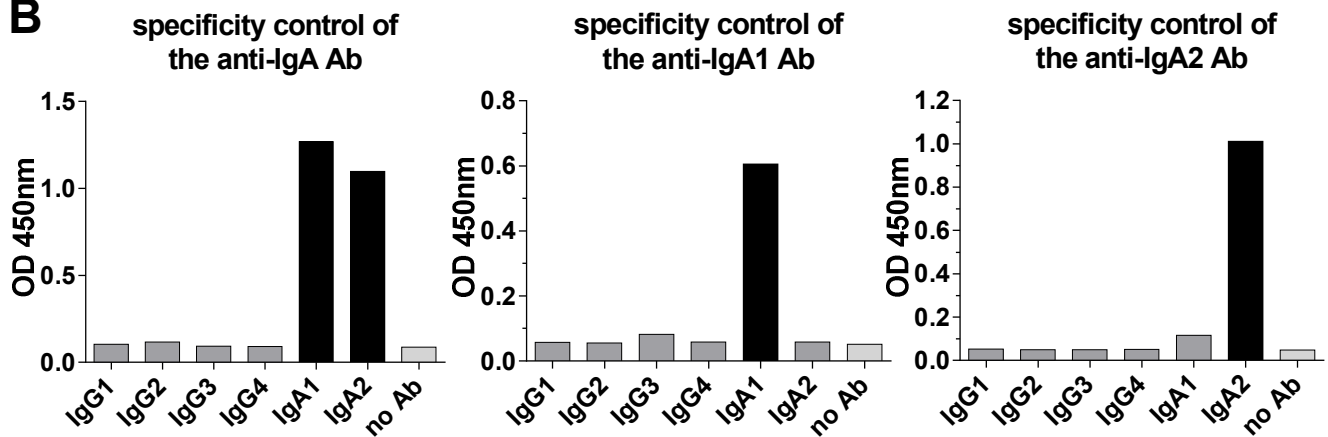

S-Figure 1

**A**

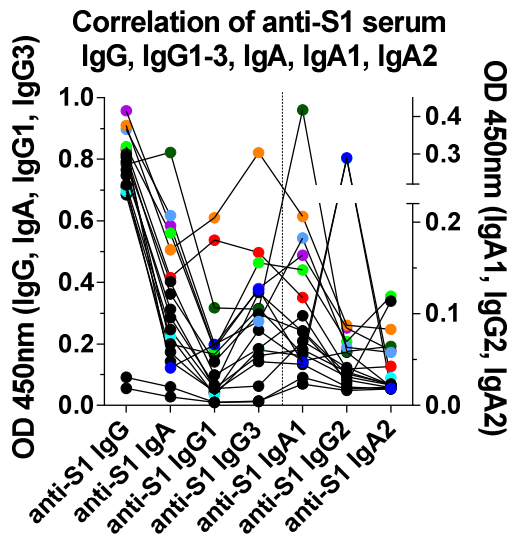

Supplement: Supplementary file [file media-1.pdf]
